# Supplementary material for: Phylogeography of Two Enigmatic Sulphur Butterflies,<em> Colias mongola</em> Alphéraky, 1897 and <em>Colias tamerlana</em> Staudinger, 1897 (Lepidoptera, Pieridae), with Relations to <em>Wolbachia </em>Infection
Source: Preprints.org preprint supplement (doi:10.20944/preprints202311.0363.v1), 2023-11-06
Supplement: Supplementary file 2 [file Table_S2.docx]

**Table S2.** Variable sites of the studied *Ca-ATPase*, *CAD*, and *H3* nuclear genes fragments among the 17 sequenced samples of *C .mongola*/*C. tamerlana.*

| **Sample ID** | **COI**  **haplotype** | ***CAD*** | | | | | | | | | | | | | | | | | | | | | | |
| --- | --- | --- | --- | --- | --- | --- | --- | --- | --- | --- | --- | --- | --- | --- | --- | --- | --- | --- | --- | --- | --- | --- | --- | --- |
| **13** | **82** | **145** | **148** | **151** | **169** | **178** | **193** | **211** | **246** | **247** | **256** | **298** | **319** | **342** | **352** | **406** | **514** | **541** | **580** | **685** | **719** | **763** |
| CL42m | hp1a | C | G/T | A/G | A | A | T | T | A/C | C/T | T | A/T | A | T | A | A | A | A/G | A | C/T | G | A | G | T |
| Mnt17 | hp1a | C | G | G | G | C | A | C | A | T | T | A | A | A | G | A | A | A | A | T | G | A | G | C/T |
| CL34m | hp1c | C/T | G/T | A/G | A | A | T | T | A/C | C/T | T | A/T | A/T | T | A | A | A | A/G | A/T | C/T | G | A | G | T |
| CL39m | hp2 | C/T | G | A/G | A/G | A/C | A/T | C/T | A | C/T | T | A/T | A/T | A/T | A/G | A | A/G | A | A/T | T | A/G | A/G | G | T |
| CL43m | hp2 | C | G | G | A/G | A/C | A/T | C/T | A/C | T | T | A | A | A/T | A/G | A | A | A | A | T | G | A | G | C/T |
| Mnt18 | hp2 | T | T | A | A | A | T | T | A | C | T | T | A | T | A | A | A | A | A | T | G | A | A | T |
| Ku02 | hp2 | C | G | G | G | C | A | C | A | T | T | A | A | A | G | A | A/G | A | A | T | A/G | A/G | G | T |
| Mnt28z | hp3a | C | G | G | A/G | A/C | A/T | C/T | A/C | T | T | A | A | T | A/G | A | A | G | A | C/T | G | A | G | T |
| CL40m | hp3a | C | G/T | A/G | A | A | T | T | A/C | C/T | T | A/T | A | T | A | A | A | G | A | C/T | G | A | G | T |
| Mnt04 | hp3b | C | G | G | A/G | A/C | A/T | C/T | A/C | T | T | A | A | A/T | A/G | A/G | A | A/G | A | C/T | G | A | G | T |
| Mnt30z | hp3d | C | G | G | A | A | T | T | C | T | T | A | A | T | A | A | A | G | A | C | G | A | G | T |
| Ku01 | hp3e | C/T | G/T | N | G | A/C | A/T | C/T | A | C/T | T | A/T | A | T | A/G | A | A | A | A | T | G | A | A | T |
| Mnt29z | hp3e | C | G/T | A/G | A | A | T | T | A/C | C/T | G/T | A | A | T | A | A | A | A/G | A | C/T | G | A | G | T |
| Mnt20 | hp4a | C/T | T | A | A | A | T | T | A | C | T | T | A/T | T | A | A | A | A | A/T | T | G | A | G | T |
| Mnt21 | hp4a | C/T | G/T | A/G | A | A | T | T | A/C | C/T | T | A/T | A/T | T | A | A/G | A | A/G | A/T | C/T | G | A | G | T |
| Ku03 | hp4a | C | G/T | A/G | A | A | T | T | A/C | C/T | T | A/T | A | T | A | A | A | A/G | A | C/T | G | A | G | T |
| Ku04 | hp4a | C | G | G | G | A/C | A/T | C/T | A/C | T | G/T | A | A | T | G | A | A | N | A | C/T | G | A | G | C/T |

**Table S2 (continuation).** Variable sites of the studied *Ca-ATPase*, *CAD*, and *H3* nuclear genes fragments among the 17 sequenced samples of *C .mongola*/*C. tamerlana.*

| **Sample ID** | **COI**  **haplotype** | ***Ca-ATPase*** | | | |  | ***H3*** |
| --- | --- | --- | --- | --- | --- | --- | --- |
| **238** | **352** | **379** | **406** |  | **46** |
| CL42m | hp1a | C/T | G | A | T |  | G |
| Mnt17 | hp1a | C | G | A/G | C/T |  | G |
| CL34m | hp1c | C | G | A/G | C/T |  | C |
| CL39m | hp2 | C | G | A | T |  | G/C |
| CL43m | hp2 | C | A/G | G | C |  | G |
| Mnt18 | hp2 | C | G | A/G | C/T |  | C |
| Ku02 | hp2 | T | G | A | T |  | G |
| Mnt28z | hp3a | C | G | A/G | C/T |  | G |
| CL40m | hp3a | C | G | A/G | C/T |  | C |
| Mnt04 | hp3b | C | G | A/G | C/T |  | G/C |
| Mnt30z | hp3d | C | G | A/G | T |  | G/C |
| Ku01 | hp3e | C | G | A | T |  | G/C |
| Mnt29z | hp3e | C | G | A | T |  | G/C |
| Mnt20 | hp4a | C/T | G | A | T |  | C |
| Mnt21 | hp4a | C | G | A | T |  | G/C |
| Ku03 | hp4a | C | G | A/G | C/T |  | G/C |
| Ku04 | hp4a | C | G | A | T |  | G |
